# Supplementary material for: Assessing Green Methods for Pectin Extraction from Waste Orange Peels
Source: PubMed Central journal article supplement (PMC8004147; doi:10.3390/molecules26061766), 2021-03-21
Supplement: molecules-26-01766-s001.pdf [file molecules-26-01766-s001.pdf]

Article

# Assessing Green Methods for Pectin Extraction from Waste Orange Peels

Laura Benassi <sup>1,2</sup>, Ivano Alessandri <sup>2,3,4,5,\*</sup> and Irene Vassalini <sup>2,3,4,5,\*</sup>

<sup>1</sup> B+LabNet, Environmental Sustainability Laboratory, University of Brescia, via Branze 45, 25123 Brescia, Italy; laura.benassi@unibs.it

<sup>2</sup> INSTM, U. d. R. Brescia, via Branze 38, 25123 Brescia, Italy

<sup>3</sup> Chemistry for Technologies Laboratory, Mechanical and Industrial Engineering Department, University of Brescia, via Branze 38, 25123 Brescia, Italy

<sup>4</sup> CNR-INO, via Branze 38, 25123 Brescia, Italy

<sup>5</sup> Department of Information Engineering, University of Brescia, via Branze 38, 25123 Brescia, Italy

\* Correspondence: ivano.alessandri@unibs.it (I.A.); irene.vassalini@unibs.it (I.V.); Tel.: +39-030-3715475 (I.A.); +39-030-3715405 (I.V.)

Tables S1–S12 contain details on the calculation of estimated energy demand for the different extraction protocols.

Figure S1: Morphological characterization of pectin extracted through variations of “hot-water” extractions.

Figure S2: Fourier Transform Infrared (FT-IR) characterization of pectin derived from “hot-water” extraction (extraction 3) and depectinated residues.

**Table S1.** Calculation of the energy consumed by each instrument.

| experimental step        | Power (W) | Time (s) | Energy (kJ) |
|--------------------------|-----------|----------|-------------|
| microwave (pretreatment) | 550       | 300      | 165         |
| blender (grinding)       | 1500      | 6        | 9           |
| RSLD 3h                  | 100       | 10,800   | 1080        |
| RSLD 5h                  | 100       | 18,000   | 1800        |
| centrifuge               | 100       | 1860     | 186         |
| microwave (extraction)   | 300       | 600      | 180         |
| freeze-drying            | 3520      | 36,000   | 126,720     |
| hot plate 1h             | 39        | 60       | 2340        |
| hot plate 3h             | 39        | 180      | 7020        |

**Table S2.** Calculation of the energy consumed by instruments for the production of 10g of pectin, following the protocol of extraction 1. Due to the low extraction yield (10%), some of the single operations had to be repeated 7 times.

Extraction 1.

|                          | Operation | Energy Single Rep (kJ) | n° Rep | Tot Energy (MJ) |
|--------------------------|-----------|------------------------|--------|-----------------|
| microwave (pretreatment) | yes       | 165                    | 7      | 1.155           |
| blender (grinding)       | no        | 0                      | 0      | 0               |
| RSLD 3h                  | no        | 0                      | 0      | 0               |
| RSLD 5h                  | no        | 0                      | 0      | 0               |
| centrifuge               | yes       | 186                    | 7      | 1.302           |
| microwave (extraction)   | no        | 0                      | 0      | 0               |
| freeze-drying            | no        | 0                      | 0      | 0               |
| hot plate 1h             | yes       | 2340                   | 7      | 16.38           |

|                     |    |      |   |        |
|---------------------|----|------|---|--------|
| <b>hot plate 3h</b> | no | 0    | 0 | 0      |
| <b>tot energy</b>   |    | 2691 |   | 18.837 |

**Table S3.** Calculation of the energy consumed by instruments for the production of 10g of pectin, following the protocol of extraction 2. Due to the low extraction yield (10%), some of the single operations had to be repeated 7 times.

**Extraction 2.**

|                                 | Operation | Energy Single Rep (kJ) | n° Rep | Tot Energy (MJ) |
|---------------------------------|-----------|------------------------|--------|-----------------|
| <b>microwave (pretreatment)</b> | yes       | 165                    | 7      | 1.155           |
| <b>blender (grinding)</b>       | no        | 0                      | 0      | 0               |
| <b>RSLD 3h</b>                  | no        | 0                      | 0      | 0               |
| <b>RSLD 5h</b>                  | no        | 0                      | 0      | 0               |
| <b>centrifuge</b>               | yes       | 186                    | 7      | 1.302           |
| <b>microwave (extraction)</b>   | no        | 0                      | 0      | 0               |
| <b>freeze-drying</b>            | no        | 0                      | 0      | 0               |
| <b>hot plate 1h</b>             | no        | 0                      | 0      | 0               |
| <b>hot plate 3h</b>             | yes       | 7020                   | 7      | 49.14           |
| <b>tot energy</b>               |           | 7371                   |        | 51.597          |

**Table S4.** Calculation of the energy consumed by instruments for the production of 10g of pectin, following the protocol of extraction 3. Due to the low extraction yield (3.5%), some of the single operations had to be repeated 15 times.

**Extraction 3.**

|                                 | Operation | Energy Single Rep (KJ) | n° Rep | Tot Energy (MJ) |
|---------------------------------|-----------|------------------------|--------|-----------------|
| <b>microwave (pretreatment)</b> | yes       | 165                    | 15     | 2.475           |
| <b>blender (grinding)</b>       | yes       | 9                      | 15     | 0.135           |
| <b>RSLD 3h</b>                  | no        | 0                      | 0      | 0               |
| <b>RSLD 5h</b>                  | no        | 0                      | 0      | 0               |
| <b>centrifuge</b>               | yes       | 186                    | 15     | 2.79            |
| <b>microwave (extraction)</b>   | no        | 0                      | 0      | 0               |
| <b>freeze-drying</b>            | no        | 0                      | 0      | 0               |
| <b>hot plate 1h</b>             | yes       | 2340                   | 15     | 35.1            |
| <b>hot plate 3h</b>             | no        | 0                      | 0      | 0               |
| <b>tot energy</b>               |           | 2700                   |        | 40.500          |

**Table S5.** Calculation of the energy consumed by instruments for the production of 10g of pectin, following the protocol of extraction 4. Due to the low extraction yield (21%), some of the single operations had to be repeated 4 times.

**Extraction 4.**

|                                 | Operation | Energy Single Rep (kJ) | n° Rep | Tot Energy (MJ) |
|---------------------------------|-----------|------------------------|--------|-----------------|
| <b>microwave (pretreatment)</b> | yes       | 165                    | 4      | 0.66            |
| <b>blender (grinding)</b>       | yes       | 9                      | 4      | 0.036           |
| <b>RSLD 3h</b>                  | no        | 0                      | 0      | 0               |
| <b>RSLD 5h</b>                  | no        | 0                      | 0      | 0               |
| <b>centrifuge</b>               | yes       | 186                    | 4      | 0.744           |

|                               |     |      |   |      |
|-------------------------------|-----|------|---|------|
| <b>microwave (extraction)</b> | no  | 0    | 0 | 0    |
| <b>freeze-drying</b>          | no  | 0    | 0 | 0    |
| <b>hot plate 1h</b>           | yes | 2340 | 4 | 9.36 |
| <b>hot plate 3h</b>           | no  | 0    | 0 | 0    |
| <b>tot energy</b>             |     | 2700 |   | 10.8 |

**Table S6.** Calculation of the energy consumed by instruments for the production of 10g of pectin, following the protocol of extraction 5. Due to the low extraction yield (1.4%), some of the single operations had to be repeated 3 times.

**Extraction 5.**

|                                 | <b>Operation</b> | <b>Energy Single Rep (kJ)</b> | <b>n° Rep</b> | <b>Tot Energy (MJ)</b> |
|---------------------------------|------------------|-------------------------------|---------------|------------------------|
| <b>microwave (pretreatment)</b> | yes              | 165                           | 3             | 0.495                  |
| <b>blender (grinding)</b>       | no               | 0                             | 0             | 0                      |
| <b>RSLD 3h</b>                  | no               | 0                             | 0             | 0                      |
| <b>RSLD 5h</b>                  | yes              | 1800                          | 3             | 5.4                    |
| <b>centrifuge</b>               | yes              | 186                           | 3             | 0.558                  |
| <b>microwave (extraction)</b>   | no               | 0                             | 0             | 0                      |
| <b>freeze-drying</b>            | no               | 0                             | 0             | 0                      |
| <b>hot plate 1h</b>             | no               | 0                             | 0             | 0                      |
| <b>hot plate 3h</b>             | no               | 0                             | 0             | 0                      |
| <b>tot energy</b>               |                  | 2151                          |               | 6.453                  |

**Table S7.** Calculation of the energy consumed by instruments for the production of 10g of pectin, following the protocol of extraction 6. Due to the low extraction yield (1%), some of the single operations had to be repeated 9 times.

**Extraction 6.**

|                                 | <b>Operation</b> | <b>Energy Single Rep (kJ)</b> | <b>n° Rep</b> | <b>Tot Energy (MJ)</b> |
|---------------------------------|------------------|-------------------------------|---------------|------------------------|
| <b>microwave (pretreatment)</b> | no               | 0                             | 0             | 0                      |
| <b>blender (grinding)</b>       | yes              | 9                             | 9             | 0.081                  |
| <b>RSLD 3h</b>                  | yes              | 1080                          | 9             | 9.72                   |
| <b>RSLD 5h</b>                  | no               | 0                             | 0             | 0                      |
| <b>centrifuge</b>               | yes              | 186                           | 9             | 1.674                  |
| <b>microwave (extraction)</b>   | no               | 0                             | 0             | 0                      |
| <b>freeze-drying</b>            | no               | 0                             | 0             | 0                      |
| <b>hot plate 1h</b>             | no               | 0                             | 0             | 0                      |
| <b>hot plate 3h</b>             | no               | 0                             | 0             | 0                      |
| <b>tot energy</b>               |                  | 1750                          |               | 11.475                 |

**Table S8.** Calculation of the energy consumed by instruments for the production of 10g of pectin, following the protocol of extraction 7. Due to the low extraction yield (1%), some of the single operations had to be repeated 9 times.

**Extraction 7.**

|                                 | Operation         | Energy Single Rep (kJ) | n° Rep | Tot Energy (MJ) |
|---------------------------------|-------------------|------------------------|--------|-----------------|
| <b>microwave (pretreatment)</b> | no                | 0                      | 0      | 0               |
| <b>blender (grinding)</b>       | yes               | 9                      | 9      | 0.081           |
| <b>RSLD 3h</b>                  | no                | 0                      | 0      | 0               |
| <b>RSLD 5h</b>                  | yes               | 1800                   | 9      | 16.2            |
| <b>centrifuge</b>               | yes               | 186                    | 9      | 1.674           |
| <b>microwave (extraction)</b>   | no                | 0                      | 0      | 0               |
| <b>freeze-drying</b>            | no                | 0                      | 0      | 0               |
| <b>hot plate 1h</b>             | no                | 0                      | 0      | 0               |
| <b>hot plate 3h</b>             | no                | 0                      | 0      | 0               |
|                                 | <b>tot energy</b> | 1995                   |        | 17.995          |

**Table S9.** Calculation of the energy consumed by instruments for the production of 10g of pectin, following the protocol of extraction 8. Due to the low extraction yield (1%), some of the single operations has to be repeated 9 times. On the contrary, we decided to consider freeze-drying just once, since the chamber of the freeze-dryer was big enough to host the amount of orange peel (OP) necessary to produce 10 g of pectin.

**Extraction 8.**

|                                 | Operation         | Energy Single Rep (kJ) | n° Rep | Tot Energy (MJ) |
|---------------------------------|-------------------|------------------------|--------|-----------------|
| <b>microwave (pretreatment)</b> | yes               | 165                    | 9      | 1.485           |
| <b>blender (grinding)</b>       | no                | 0                      | 0      | 0               |
| <b>RSLD 3h</b>                  | no                | 0                      | 0      | 0               |
| <b>RSLD 5h</b>                  | yes               | 1800                   | 9      | 16.2            |
| <b>centrifuge</b>               | yes               | 186                    | 9      | 1.674           |
| <b>microwave (extraction)</b>   | no                | 0                      | 0      | 0               |
| <b>freeze-drying</b>            | yes               | 126,720                | 1      | 126.72          |
| <b>hot plate 1h</b>             | no                | 0                      | 0      | 0               |
| <b>hot plate 3h</b>             | no                | 0                      | 0      | 0               |
|                                 | <b>tot energy</b> | 128,871                |        | 146.079         |

**Table S10.** Calculation of the energy consumed by instruments for the production of 10g of pectin, following the protocol of extraction 9. Due to the low extraction yield (2.5%), some of the single operations had to be repeated more times. In particular, the sample holder of the microwave was very small and could only host 2g of OP, so we decided to group 6 samples before performing centrifugation. In addition, we decided to consider freeze-drying just once, since the chamber of the freeze-dryer was big enough to host the amount of OP necessary to produce 10 g of pectin.

**Extraction 9.**

|                                 | Operation | Energy Single Rep (kJ) | n° Rep | Tot Energy (MJ) |
|---------------------------------|-----------|------------------------|--------|-----------------|
| <b>microwave (pretreatment)</b> | no        | 0                      | 0      | 0               |
| <b>blender (grinding)</b>       | no        | 0                      | 0      | 0               |

|                               |     |         |     |         |
|-------------------------------|-----|---------|-----|---------|
| <b>RSLD 3h</b>                | no  | 0       | 0   | 0       |
| <b>RSLD 5h</b>                | no  | 0       | 0   | 0       |
| <b>centrifuge</b>             | yes | 186     | 33  | 6.138   |
| <b>microwave (extraction)</b> | yes | 180     | 198 | 35.64   |
| <b>freeze-drying</b>          | yes | 126,720 | 1   | 126.72  |
| <b>hot plate 1h</b>           | no  | 0       | 0   | 0       |
| <b>hot plate 3h</b>           | no  | 0       | 0   | 0       |
| <b>tot energy</b>             |     | 127,086 |     | 168.498 |

**Table S11.** Calculation of the energy consumed by instruments for the production of 10g of pectin, following the protocol of extraction 11. Due to the low extraction yield (6.2%), some of the single operations had to be repeated more times. In particular, the sample holder of the microwave was very small and could only host 2g of OP, so we decided to group 6 samples before performing centrifugation.

**Extraction 10.**

|                                 | Operation | Energy Single Rep (kJ) | n° Rep | Tot Energy (MJ) |
|---------------------------------|-----------|------------------------|--------|-----------------|
| <b>microwave (pretreatment)</b> | no        | 0                      | 0      | 0               |
| <b>blender (grinding)</b>       | yes       | 9                      | 13     | 0.117           |
| <b>RSLD 3h</b>                  | no        | 0                      | 0      | 0               |
| <b>RSLD 5h</b>                  | no        | 0                      | 0      | 0               |
| <b>centrifuge</b>               | yes       | 186                    | 13     | 2.418           |
| <b>microwave (extraction)</b>   | yes       | 180                    | 78     | 14.04           |
| <b>freeze-drying</b>            | no        | 0                      | 0      | 0               |
| <b>hot plate 1h</b>             | no        | 0                      | 0      | 0               |
| <b>hot plate 3h</b>             | no        | 0                      | 0      | 0               |
| <b>tot energy</b>               |           | 375                    |        | 16.575          |

**Table S12.** Calculation of the embodied energy of the chemicals involved in the different extraction protocols for the production of 10 g of pectin.

| Extraction | OP Mass (g) | Water Volume (ml) | n° Rep | Total Ethanol Volume (ml) | Citric Acid (kg) | Total Ethanol Embodied Energy (MJ) | Total Citric Acid Embodied Energy (MJ) |
|------------|-------------|-------------------|--------|---------------------------|------------------|------------------------------------|----------------------------------------|
| <b>1</b>   | 15          | 300               | 7      | 2110                      | 0                | 71.752449                          |                                        |
| <b>2</b>   | 15          | 600               | 7      | 4210                      | 0                | 143.164839                         |                                        |
| <b>3</b>   | 20          | 400               | 15     | 6010                      | 0                | 204.375459                         |                                        |
| <b>4</b>   | 15          | 300               | 4      | 1210                      | 0.032            | 41.147139                          | 2.74112                                |
| <b>5</b>   | 250         | 1000              | 3      | 3010                      | 0                | 102.357759                         |                                        |
| <b>6</b>   | 110         | 1100              | 9      | 9910                      | 0                | 336.998469                         |                                        |
| <b>7</b>   | 110         | 1100              | 9      | 9910                      | 0                | 336.998469                         |                                        |
| <b>8</b>   | 110         | 1100              | 9      | 9910                      | 0.27             | 336.998469                         | 23.1282                                |
| <b>9</b>   | 12          | 72                | 33     | 3574                      | 0                | 121.5370866                        |                                        |
| <b>10</b>  | 12          | 72                | 13     | 1414                      | 0                | 48.0843426                         |                                        |

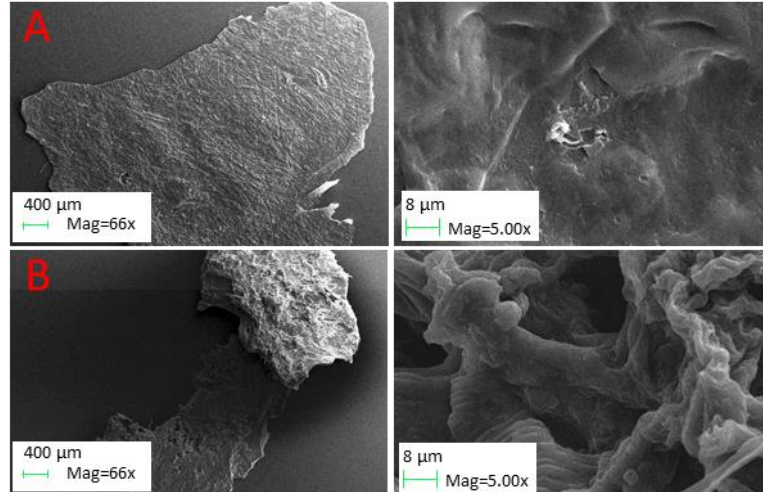

**Figure S1.** Low- and high-magnification SEM images for “hot-water” extracted pectin: **A)** extraction 1; **B)** extraction 3.

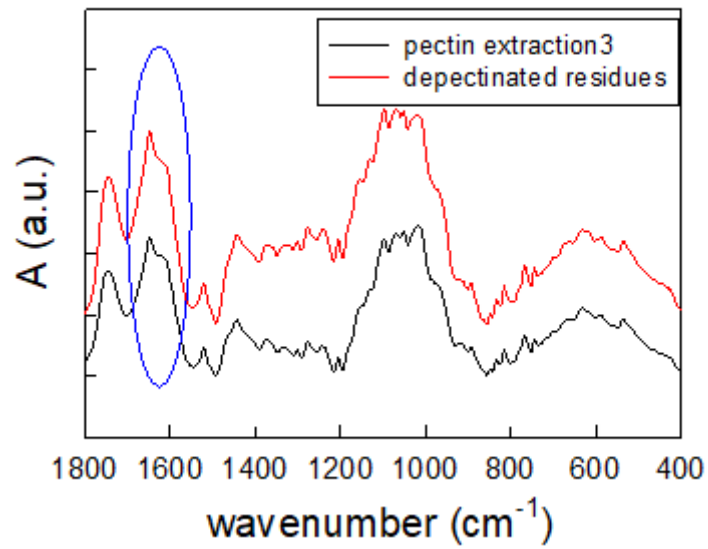

**Figure S2.** Comparison between the Fourier Transform Infrared (FT-IR) spectra of pectin derived from extraction 3 and de-pectinated residues. Impurities are highlighted.
